# Supplementary material for: Human fibroblasts display a differential focal adhesion phenotype relative to chimpanzee
Source: PubMed Central journal article supplement (PMC4804348; doi:10.1093/emph/eow010), 2016-03-12

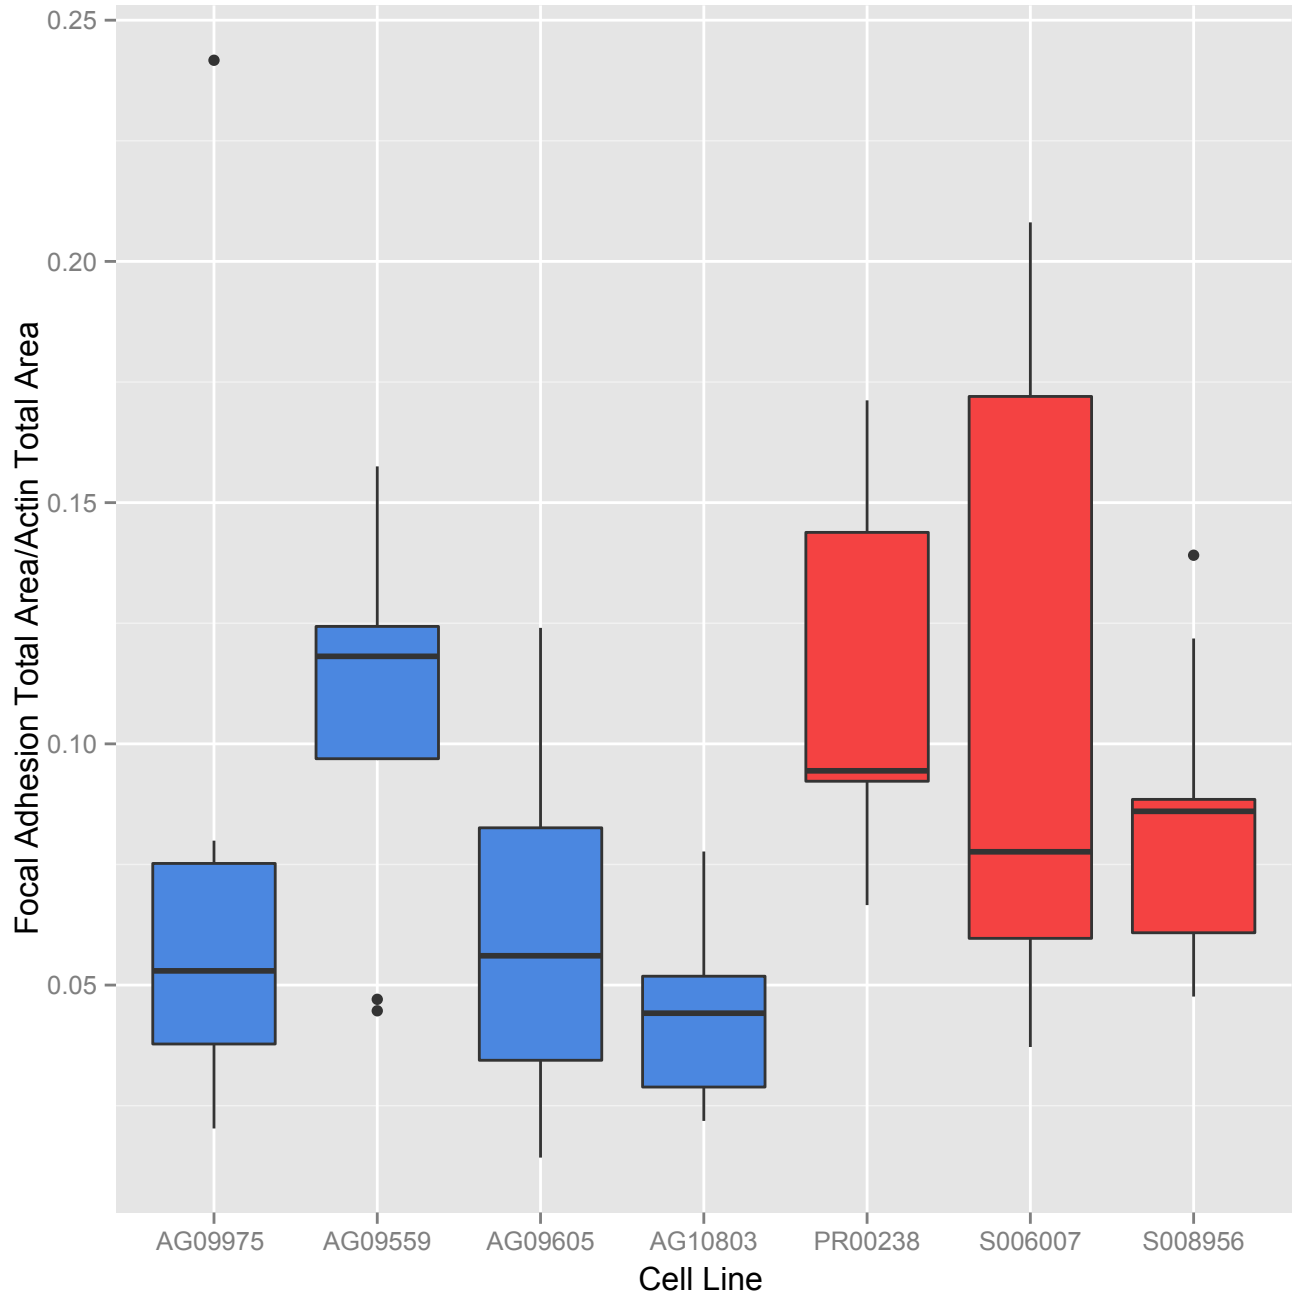

Supplement: supp_eow010_FigureS1.pdf [file supp_eow010_FigureS1.pdf]
